# Supplementary material for: Enhanced electrocatalytic activities of three dimensional PtCu@Pt bimetallic alloy nanofoams for oxygen reduction reaction
Source: Royal Society of Chemistry journal article supplement (doi:10.1039/c5cy02288f), 2016-01-01
Supplement: c5cy02288f1.pdf [file c5cy02288f1.pdf]

## **The Enhanced Electrocatalytic Activities of Three Dimensional PtCu@Pt Bimetallic Alloy Nanofoams for Oxygen Reduction Reaction**

Shaofang Fu,<sup>a</sup> Chengzhou Zhu,<sup>a\*</sup> Qirong Shi,<sup>a</sup> Dan Du,<sup>a</sup> Yuehe Lin<sup>a,b\*</sup>

<sup>a</sup> The School of Mechanical and Materials Engineering, Washington State University, Pullman, WA 99164, USA.

<sup>b</sup> Pacific Northwest National Laboratory, Richland, WA 99352, USA.

Corresponding author:

Email: [chengzhou.zhu@wsu.edu](mailto:chengzhou.zhu@wsu.edu) and [yuehe.lin@wsu.edu](mailto:yuehe.lin@wsu.edu)

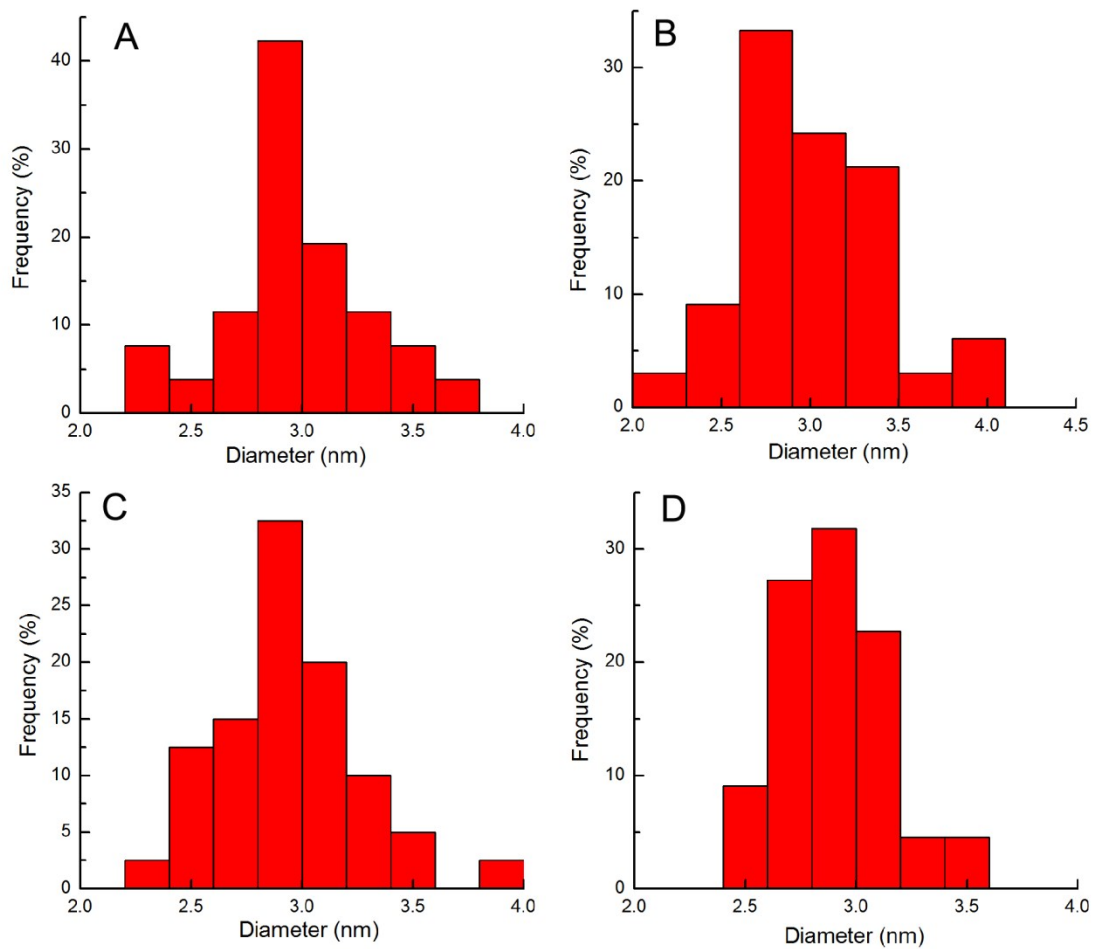

Figure. S1 Particle size distribution of Pt<sub>25</sub>Cu<sub>75</sub> (A), Pt<sub>49</sub>Cu<sub>51</sub> (B), Pt<sub>62</sub>Cu<sub>38</sub> (C), and Pt<sub>69</sub>Cu<sub>31</sub> (D)

BANFs.

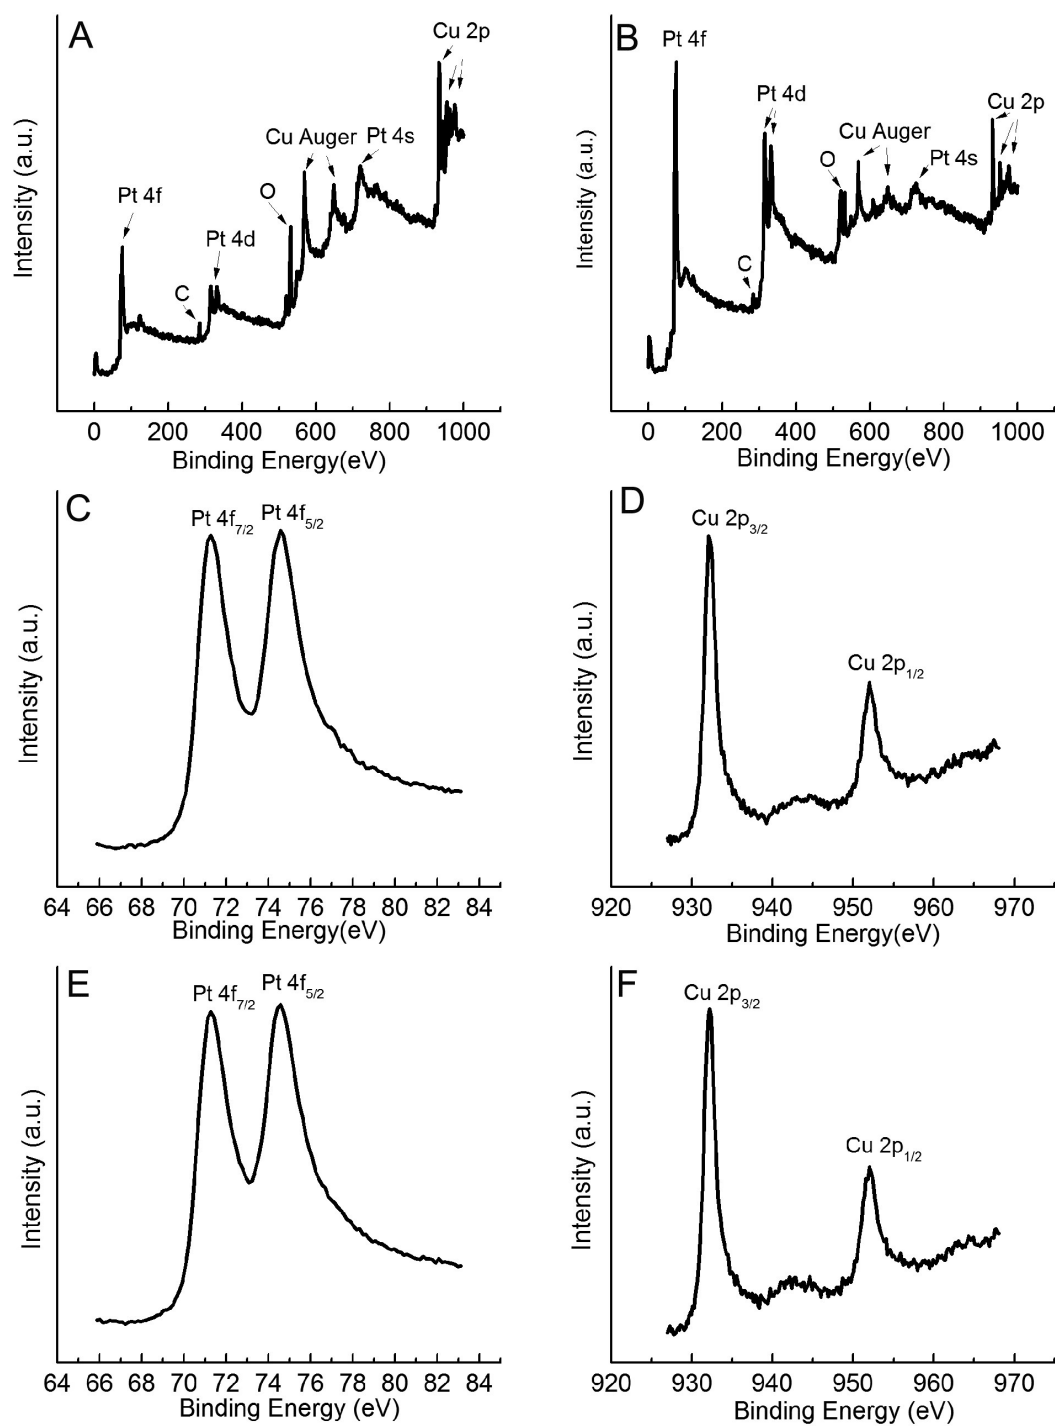

Figure. S2 XPS spectra of Pt<sub>25</sub>Cu<sub>75</sub> (A) and Pt<sub>62</sub>Cu<sub>38</sub> (B) BANFs. XPS spectra of Pt in Pt<sub>49</sub>Cu<sub>51</sub> (C) and Pt<sub>69</sub>Cu<sub>31</sub> (E) BANFs. XPS spectra of Cu in Pt<sub>49</sub>Cu<sub>51</sub> (D) and Pt<sub>69</sub>Cu<sub>31</sub> (F) BANFs.

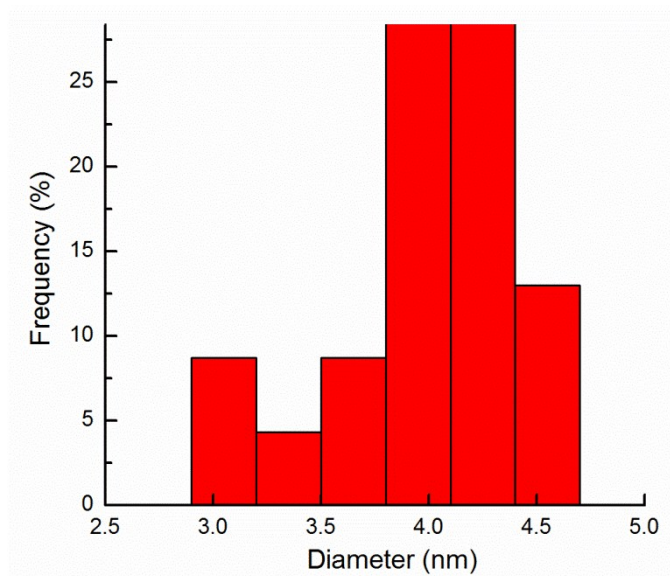

Figure. S3 Particle size distribution of Pt<sub>62</sub>Cu<sub>38</sub> BANFs after ADT.
